# Supplementary material for: An evaluation of a national oral rehydration solution and zinc scale-up program in Kenya between 2011 and 2016
Source: PubMed Central journal article supplement (PMC6608604; doi:10.7189/jogh.09.010505), 2019-06
Supplement: jogh-09-010505-s001.pdf [file jogh-09-010505-s001.pdf]

## **Online Supplementary Document**

Lam et al. An evaluation of a national ORS and zinc scale-up program in Kenya between 2011 and 2016

### **Contents**

Table S1. LiST inputs and sources for child health interventions

2

**Table S1. LiST inputs and sources for child health interventions**

| Intervention                                             | 2011 | 2012 | 2013 | 2014 | 2015 | 2016 | Sources                              |
|----------------------------------------------------------|------|------|------|------|------|------|--------------------------------------|
| ORS - oral rehydration solution                          | 44.6 | 47.6 | 50.7 | 53.8 | 48.0 | 42.2 | KDHS 2008; KDHS 2014; KNBS/CHAI 2016 |
| Zinc for treatment of diarrhea                           | 0.3  | 2.9  | 5.5  | 8.1  | 13.2 | 18.3 | KDHS 2008; KDHS 2014; KNBS/CHAI 2016 |
| Skilled birth attendance                                 | 54.6 | 57.9 | 61.2 | 64.5 | 67.8 | 71.1 | KDHS 2008; KDHS 2014                 |
| Health facility delivery                                 | 52.0 | 55.2 | 58.3 | 61.5 | 64.6 | 67.7 | KDHS 2008; KDHS 2014                 |
| Exclusive breastfeeding for <1 month                     | 68.0 | 68.7 | 69.4 | 70.2 | 73.2 | 76.3 | KDHS 2008; KDHS 2014                 |
| Prevalence of early initiation of breastfeeding          | 59.0 | 59.7 | 60.4 | 61.1 | 62.0 | 62.8 | KDHS 2008; KDHS 2014                 |
| Exclusive breastfeeding for 1-5 month                    | 44.2 | 45.5 | 46.8 | 48.1 | 51.2 | 54.3 | KDHS 2008; KDHS 2014                 |
| Any breastfeeding 6-11 month                             | 97.2 | 97.2 | 97.2 | 97.2 | 97.3 | 97.5 | KDHS 2008; KDHS 2014                 |
| Any breastfeeding 12-23 month                            | 73.6 | 73.6 | 73.6 | 73.6 | 73.9 | 74.2 | KDHS 2008; KDHS 2014                 |
| Complementary feeding                                    | 39.8 | 40.2 | 40.5 | 40.9 | 41.3 | 41.6 | KDHS 2008; KDHS 2014                 |
| Vitamin A supplementation                                | 37.0 | 66.0 | 19.0 | 28.0 | 37.0 | 41.0 | UNICEF                               |
| Improved sanitation - Utilization of latrines or toilets | 29.4 | 29.6 | 29.9 | 30.1 | 30.1 | 30.3 | WHO-UNICEF washdata.org              |
| Improved water source                                    | 60.8 | 61.6 | 62.3 | 63.1 | 63.2 | 63.9 | WHO-UNICEF washdata.org              |
| Water connection in the home                             | 21.1 | 21.3 | 21.4 | 21.6 | 21.7 | 21.8 | WHO-UNICEF washdata.org              |
| Hand washing with soap                                   | 13.7 | 13.7 | 13.8 | 13.9 | 14.0 | 14.1 | WHO-UNICEF washdata.org              |
| Hygienic disposal of children's stools                   | 80.7 | 81.5 | 82.3 | 83.1 | 83.9 | 84.7 | KDHS 2008; KDHS 2014                 |
| BCG - Single dose                                        | 99.0 | 97.0 | 92.0 | 94.0 | 87.0 | 99.0 | WHO-UNICEF                           |
| Polio - Three doses                                      | 97.0 | 94.0 | 94.0 | 93.0 | 83.0 | 88.0 | WHO-UNICEF                           |
| Pentavalent                                              | 96.0 | 94.0 | 87.0 | 92.0 | 89.0 | 89.0 | WHO-UNICEF                           |
| Pneumococcal - Three doses                               | 85.0 | 82.0 | 75.0 | 81.0 | 75.0 | 78.0 | WHO-UNICEF                           |
| Rotavirus - Two doses                                    | 0.0  | 0.0  | 0.0  | 19.0 | 66.0 | 74.0 | WHO-UNICEF                           |
| Meningococcal A - Single dose                            | 0.0  | 0.0  | 0.0  | 0.0  | 0.0  | 0.0  | WHO-UNICEF                           |
| Measles - Single dose                                    | 87.0 | 93.0 | 94.0 | 95.0 | 96.0 | 96.0 | WHO-UNICEF                           |
| Oral antibiotics for pneumonia                           | 60.8 | 62.5 | 64.1 | 65.7 | 67.4 | 69.0 | KDHS 2008; KDHS 2014                 |
| ACTs for treatment of malaria                            | 11.2 | 11.9 | 12.5 | 13.1 | 15.0 | 15.0 | KDHS 2008; KDHS 2014                 |
